# Supplementary material
Source: HighWire-hosted journal article supplement (https://jmg.bmj.com/content/61/3/232)
Supplement: inline-supplementary-material-14 [file inline-supplementary-material-14.pdf]

Supplementary Table 13. Rare germline variants (CADD>15) in genes previously published in a linkage study (29) and genome wide association studies associated with, ( $p < 5 \times 10^{-8}$ ), pelvic organ prolapse (PMID: 32184442), knee pain and rotator cuff injury (<https://www.ebi.ac.uk/gwas/>)

| Patient ID | Clinical Diagnosis     | Current Gene annotation | Gene  | HGVSc                           | HGVSp                             | CADD | Rs ID                   | Exon or Intron / Total no. exons | gnomAD allele frequency | ACMG Classification (See footnote) |
|------------|------------------------|-------------------------|-------|---------------------------------|-----------------------------------|------|-------------------------|----------------------------------|-------------------------|------------------------------------|
| 79         | HDCT                   | c)                      | LAMC2 | ENST00000264144.4<br>c.1669T>C  | ENSP00000264144.4<br>p.Tyr557His  | 24   | –                       | 11/23                            | 0                       | VUS<br>PM2<br>PP3 (Supp)           |
| 100        | hEDS                   | a)                      | HAS1  | ENST00000222115.1<br>c.874G>A   | ENSP00000222115.1<br>p.Glu292Lys  | 33   | –                       | 3/5                              | 0                       |                                    |
| 136        | cEDS                   | c)                      | TBX5  | ENST00000310346.4<br>c.1203G>T  | ENSP00000309913.4<br>p.Trp401Cys  | 33   | rs377649723             | 9/9                              | 0.00001221              | VUS<br>PM2                         |
| 383        | cEDS                   | a)                      | HAS1  | ENST00000222115.1<br>c.1679G>A  | ENSP00000222115.1<br>p.Trp560Ter  | 40   | rs200444967             | 5/5                              | 0.0001912               |                                    |
| 428        | hEDS                   | c)                      | FAT4  | ENST00000394329.3<br>c.11147G>A | ENSP00000377862.3<br>p.Arg3716His | 21.9 | rs139635339             | 9/17                             | 0.00013                 | VUS<br>PM2                         |
| 474        | HDCT                   | c)                      | LAMC2 | ENST00000264144.4<br>c.1105C>T  | ENSP00000264144.4<br>p.Arg369Cys  | 34   | rs552102778             | 9/23                             | 0.000008122             | VUS<br>PM2                         |
| 495, 505   | hEDS (495), HDCT (505) | c)                      | ROBO2 | ENST00000487694.3<br>c.2066G>A  | ENSP00000417335.2<br>p.Arg689His  | 34   | rs376737394             | 15/27                            | 0.0001099               | VUS<br>PM2<br>PP3 (Supp)           |
| 560        | hEDS                   | c)                      | LAMC3 | ENST00000361069.4<br>c.236C>T   | ENSP00000354360.4<br>p.Ala79Val   | 27.2 | rs186188737;rs772194826 | 1/28                             | 0.00009384              | VUS<br>PM2                         |
| 566        | hEDS                   | c)                      | TBX5  | ENST00000310346.4<br>c.330C>G   | ENSP00000309913.4<br>p.Asp110Glu  | 24.5 | –                       | 4/9                              | 0                       | VUS<br>PM2<br>PP3 (Supp)           |
| 630        | hEDS                   | c)                      | LAMC3 | ENST00000361069.4<br>c.449G>A   | ENSP00000354360.4<br>p.Arg150His  | 31   | rs774775769             | 2/28                             | 0.00001224              | VUS<br>PM2<br>PP3 (M)              |
| 967        | hEDS                   | c)                      | FAT4  | ENST00000394329.3<br>c.10063A>G | ENSP00000377862.3<br>p.Ile3355Val | 22.5 | –                       | 9/17                             | 0                       | VUS<br>PM2                         |
| 1263       | hEDS                   | c)                      | SALL1 | ENST00000251020.4<br>c.2920T>C  | ENSP00000251020.4<br>p.Ser974Pro  | 20.6 | rs144429956             | 2/3                              | 0.00002034              | VUS<br>PM2<br>PP3 (Supp)           |
| 1393       | hEDS                   | c)                      | LAMC3 | ENST00000361069.4<br>c.1682C>T  | ENSP00000354360.4<br>p.Thr561Ile  | 22.1 | rs199701268             | 10/28                            | 0                       | VUS<br>PM2<br>BP4 (Supp)           |
| 1403       | hEDS                   | c)                      | LAMC2 | ENST00000264144.4<br>c.1079T>C  | ENSP00000264144.4<br>p.Ile360Thr  | 25.7 | –                       | 9/23                             | 0                       | VUS<br>PM2                         |
| 1421       | hEDS                   | a)                      | HOOK3 | ENST00000307602.4<br>c.1945A>T  | ENSP00000305699.3<br>p.Lys649Ter  | 48   | –                       | 21/22                            | 0                       |                                    |
| 1450       | hEDS                   | a)                      | HAS1  | ENST00000222115.1<br>c.1679G>A  | ENSP00000222115.1<br>p.Trp560Ter  | 40   | rs200444967             | 5/5                              | 0.0001912               |                                    |

|      |      |    |        |                                |                                   |      |              |       |             |                          |
|------|------|----|--------|--------------------------------|-----------------------------------|------|--------------|-------|-------------|--------------------------|
| 1495 | hEDS | c) | TBX5   | ENST00000310346.4<br>c.113C>G  | ENSP00000309913.4<br>p.Ser38Cys   | 25.6 | –            | 2/9   | 0           | VUS<br>PM2               |
| 1626 | hEDS | c) | SALL1  | ENST00000251020.4<br>c.1673C>T | ENSP00000251020.4<br>p.Pro558Leu  | 20.2 | –            | 2/3   | 0           | VUS<br>PM2<br>BP4 (Supp) |
| 1642 | hEDS | a) | LAMC1  | ENST00000258341.4<br>c.4729C>T | ENSP00000258341.3<br>p.Arg1577Ter | 37   | rs1031794706 | 28/28 | 0           |                          |
| 1642 | hEDS | a) | ADAM33 | ENST00000356518.2<br>c.706C>T  | ENSP00000348912.2<br>p.Arg236Cys  | 34   | rs750423431  | 8/22  | 0.000004061 |                          |

## Current gene annotation:

- a) Germline variants in this gene not currently associated with Mendelian disorder
- b) Germline variants in this gene associated with disorder of bone metabolism or skeletal dysplasia
- c) Germline variants in this gene associated with non-EDS / HTAD phenotype

ACMG classification as per Richards et al. (9): P = pathogenic, LP = likely pathogenic, = variant of uncertain significance close to criteria for LP classification, VUS = variant of uncertain significance, LB = likely benign, B = benign.

VUS\* are defined here as including VUS that according to ACGS criteria are "hot", "warm" or "tepid" Variants of Uncertain Significance (Figure 6 of <https://www.acgs.uk.com/media/11631/uk-practice-guidelines-for-variant-classification-v4-01-2020.pdf>).

Segregation analysis, re-evaluation for specific phenotypic features and/or further functional analysis may enable variant reclassification, using ACMG criteria.
